# Supplementary material for: Topological transformation of LDH nanosheets to highly dispersed PtNiFe nanoalloys enhancing CO oxidation performance
Source: Royal Society of Chemistry journal article supplement (doi:10.1039/d0nr02272a), 2020-01-01
Supplement: d0nr02272a1.pdf [file d0nr02272a1.pdf]

## Supporting Information

### **Topological Transformation of LDH Nanosheets to Highly Dispersed PtNiFe Nanoalloys that Enhances CO Oxidation Performance**

*Junfang Ding<sup>†</sup>, Liping Li<sup>†</sup>, Ye Wang<sup>†</sup>, Huixia Li<sup>†</sup>, Min Yang<sup>†</sup>, Guangshe Li<sup>\*†</sup>*

<sup>†</sup>State Key Laboratory of Inorganic Synthesis and Preparative Chemistry, College of  
Chemistry, Jilin University, Changchun 130012, P.R. China

\*E-mail: [guangshe@jlu.edu.cn](mailto:guangshe@jlu.edu.cn).

## Table of Contents

| No. | Details                                                                                                                                                                                                                                                                                | Page No. |
|-----|----------------------------------------------------------------------------------------------------------------------------------------------------------------------------------------------------------------------------------------------------------------------------------------|----------|
| 1   | <b>Figure S1</b> (a) XRD pattern, (b) EDX spectrum, and (c) TEM image of the as-synthesized NiFeAl-LDH precursor.                                                                                                                                                                      | S-4      |
| 2   | <b>Figure S2</b> (a) XRD patterns; (b) SEM image; (c) H <sub>2</sub> -TPR profiles; and (d) TGA-DSC curves of Pt/NiFeAl-LDH precursor.                                                                                                                                                 | S-5      |
| 3   | <b>Figure S3</b> XRD patterns of the samples Pt/NiFeAl-x (x represents reduction temperature).                                                                                                                                                                                         | S-6      |
| 4   | <b>Figure S4</b> Enlarged SEM images of the samples Pt/NiFeAl-x: (a) x=300; (b) x=400; (c) x=500; (d) x=550; (e) x=600; and (f) x=650.                                                                                                                                                 | S-7      |
| 5   | <b>Figure S5</b> TEM image of the samples Pt/NiFeAl-x: (a) x=200; (b) x=300; (c) x=400; (d) x=500; (e) x=550; and (f) x=650.                                                                                                                                                           | S-8      |
| 6   | <b>Figure S6</b> N <sub>2</sub> adsorption-desorption isotherms and pore size distributions calculated from the desorption branch of the samples Pt/NiFeAl-x.                                                                                                                          | S-9      |
| 7   | <b>Figure S7</b> (a) TEM image; (b) HRTEM image; (c) High-angle annular dark-field scanning TEM image; and (d) EDS mapping for Ni, Fe, Pt, Al of the sample Pt/NiFeAl-x at x=200.                                                                                                      | S-10     |
| 8   | <b>Figure S8</b> (a) TEM image; (b) HRTEM image, inset shows the FFT pattern of rectangle region; (c) High-angle annular dark-field scanning TEM image, Inset shows the enlarged image of rectangle region; and (d) EDS mapping for Ni, Fe, Pt, Al of the sample Pt/NiFeAl-x at x=300. | S-11     |
| 9   | <b>Figure S9</b> (a) TEM image; (b) HRTEM image; (c) High-angle annular dark-field scanning TEM image, Inset shows the enlarged image of rectangle region; and (d) EDS mapping for Ni, Fe, Pt, Al of the sample Pt/NiFeAl-x at x=400.                                                  | S-12     |
| 10  | <b>Figure S10</b> (a) TEM image; (b) HRTEM image, inset shows the FFT pattern of rectangle region; (c) High-angle annular dark-field scanning TEM image, Inset shows the enlarged image of rectangle region; and (d) EDS mapping for Ni, Fe, Pt, Al of the sample Pt/NiFeAl at x=500.  | S-13     |
| 11  | <b>Figure S11</b> Mössbauer spectra for the samples Pt/NiFeAl-x at (a) x=300; (b) x=500; (c) x=550; and (d) x=650.                                                                                                                                                                     | S-14     |
| 12  | <b>Figure S12</b> Temporal evolutions of the DRIFTS spectra after saturation adsorption of CO on the samples Pt/NiFeAl-x: (a) x=500, (b) x=550 and (c) x=650 during a continuous N <sub>2</sub> flushing.                                                                              | S-15     |
| 13  | <b>Table S1</b> Comparisons of CO oxidation activities of the sample Pt/NiFeAl-x at x=600 with those of catalysts reported in literatures.                                                                                                                                             | S-16     |

|    |                   |      |
|----|-------------------|------|
| 14 | <b>References</b> | S-17 |
|----|-------------------|------|

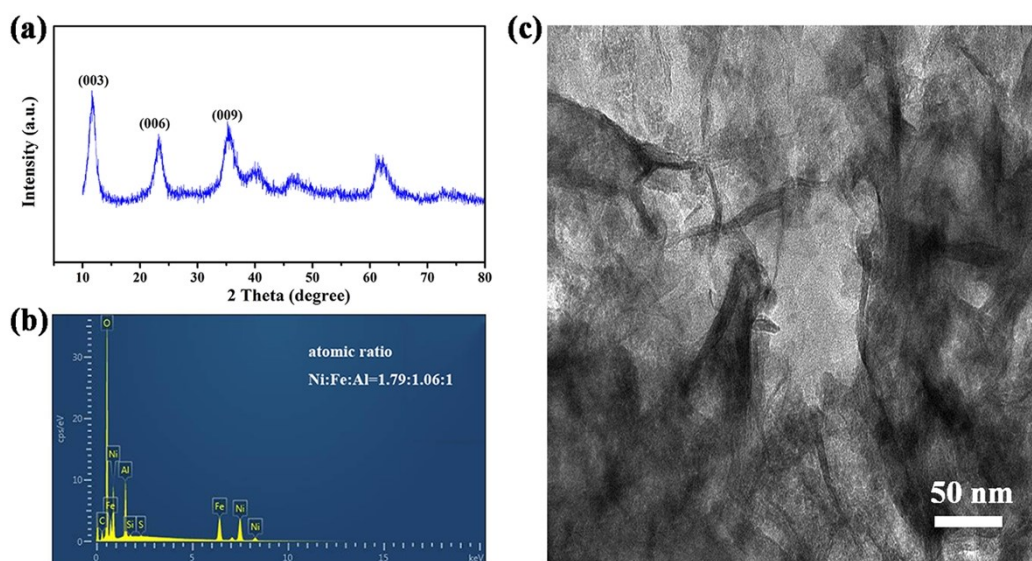

**Figure S1** (a) XRD pattern, (b) EDX spectrum, and (c) TEM image of the as-synthesized NiFeAl-LDH precursor.

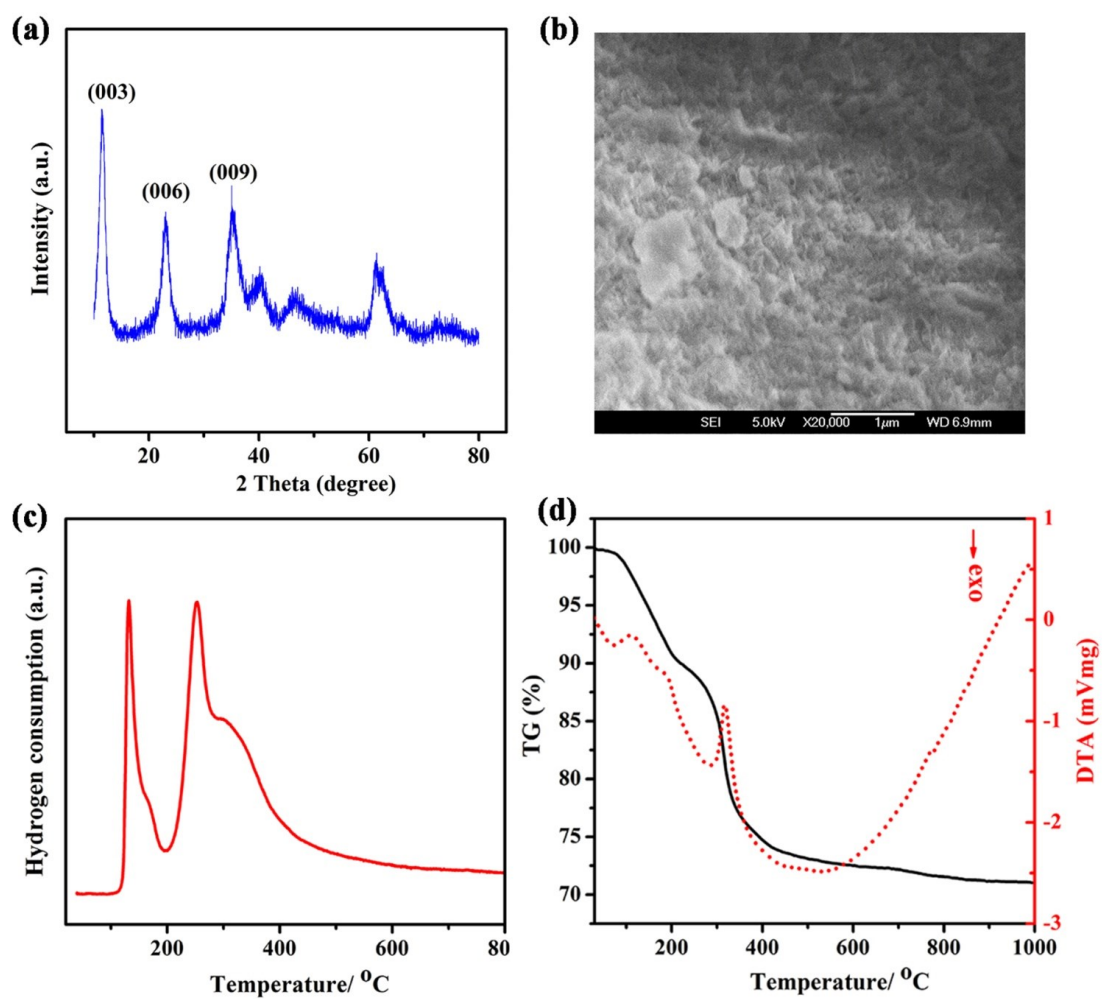

**Figure S2** (a) XRD patterns; (b) SEM image; (c) H<sub>2</sub>-TPR profiles; and (d) TGA-DSC curves of Pt/NiFeAl-LDH precursor.

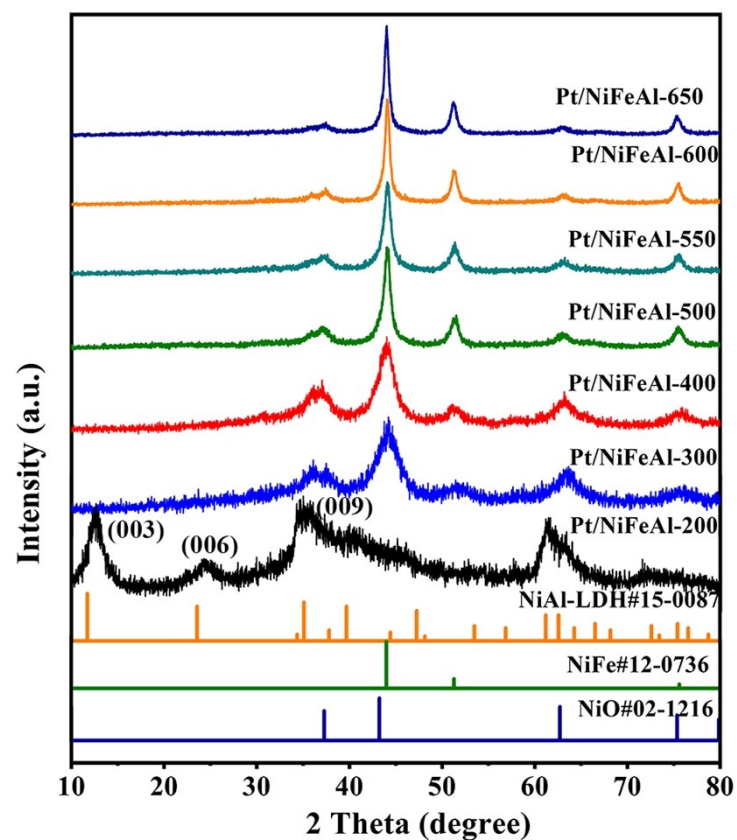

**Figure S3** XRD patterns of the samples Pt/NiFeAl-x (x represents reduction temperature).

The XRD peaks of NiFeAl-LDH nanosheets can be accordingly ascribed to the NiAl-LDH phase (JCPDS card No. 15-0087,  $R\text{-}3m(116)$ :  $a=b=3.025$ ,  $c=22.595$ ). Owing to the introduction of Fe species, resulting in lattice distortion, the positions of (003), (006) and (009) peaks slightly shifted.

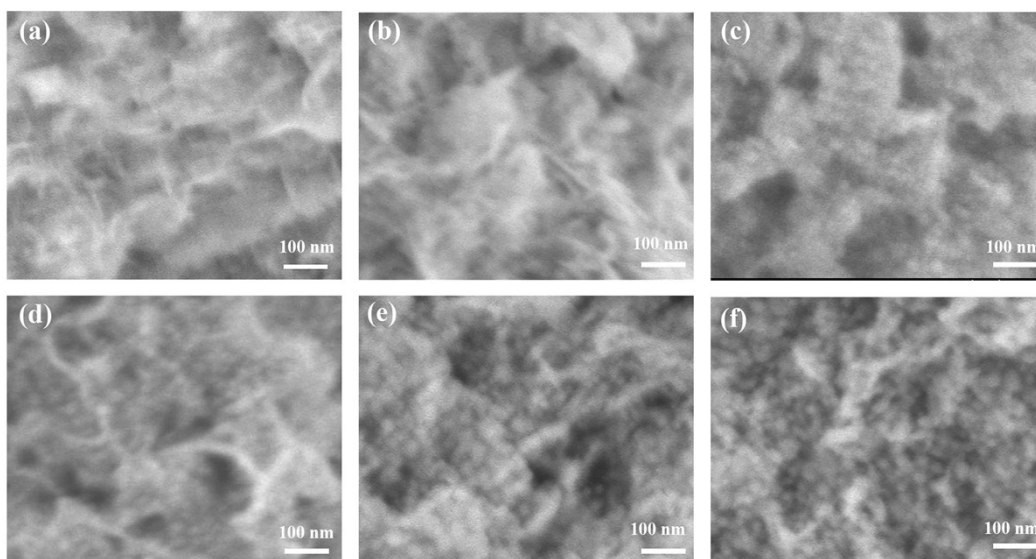

**Figure S4** Enlarged SEM images of the samples Pt/NiFeAl-x: (a) x=300; (b) x=400; (c) x=500; (d) x=550; (e) x=600; and (f) x=650.

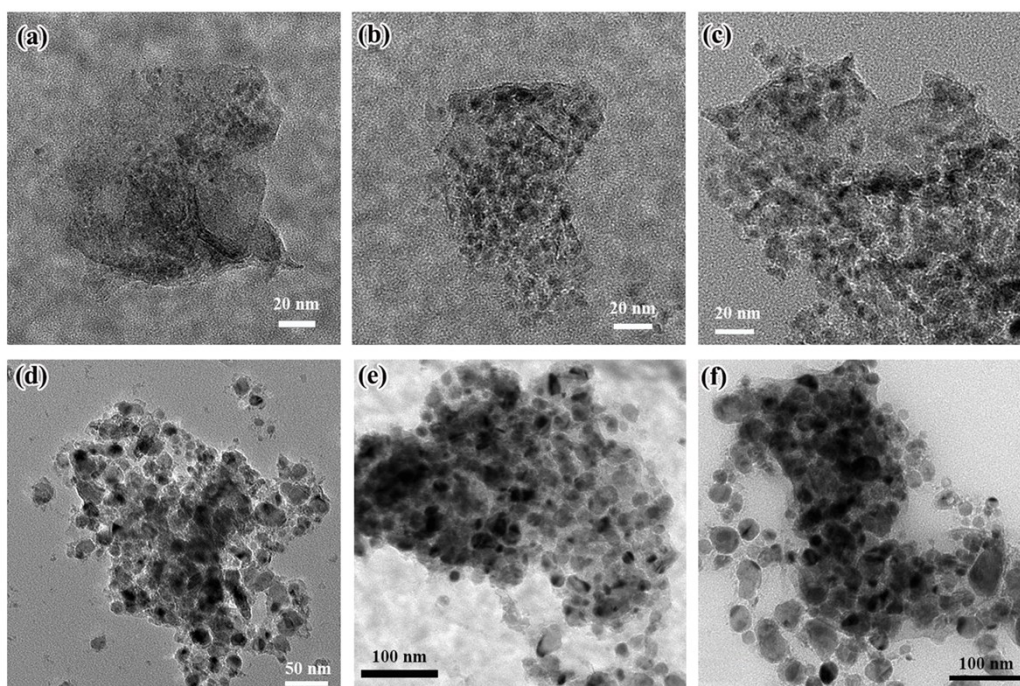

**Figure S5** TEM image of the samples Pt/NiFeAl-x: (a) x=200; (b) x=300; (c) x=400; (d) x=500; (e) x=550; and (f) x=650.

As seen in Figure S5a, sample Pt/NiFeAl-200 exhibits a uniform, silk-like, 2D nanosheet structure with a large lateral size of about several micrometers. Pt particles are uniformly dispersed on NiFeAl LDH support, showing an average size around 3 nm. When the reduction temperature increased to 300 °C, NiFe alloy nanoparticles appeared, evenly distributed on nanosheet support. As expected, NiFe alloy nanoparticles gradually became larger as reduction temperature increases.



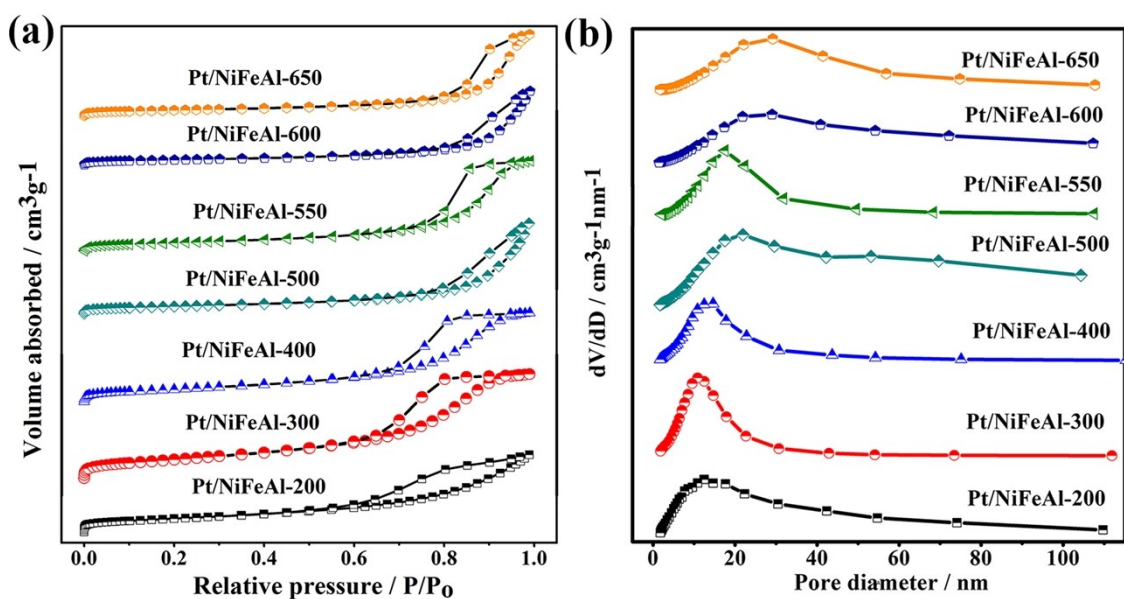

**Figure S6**  $N_2$  adsorption-desorption isotherms and pore size distributions calculated from the desorption branch of the samples Pt/NiFeAl-x.

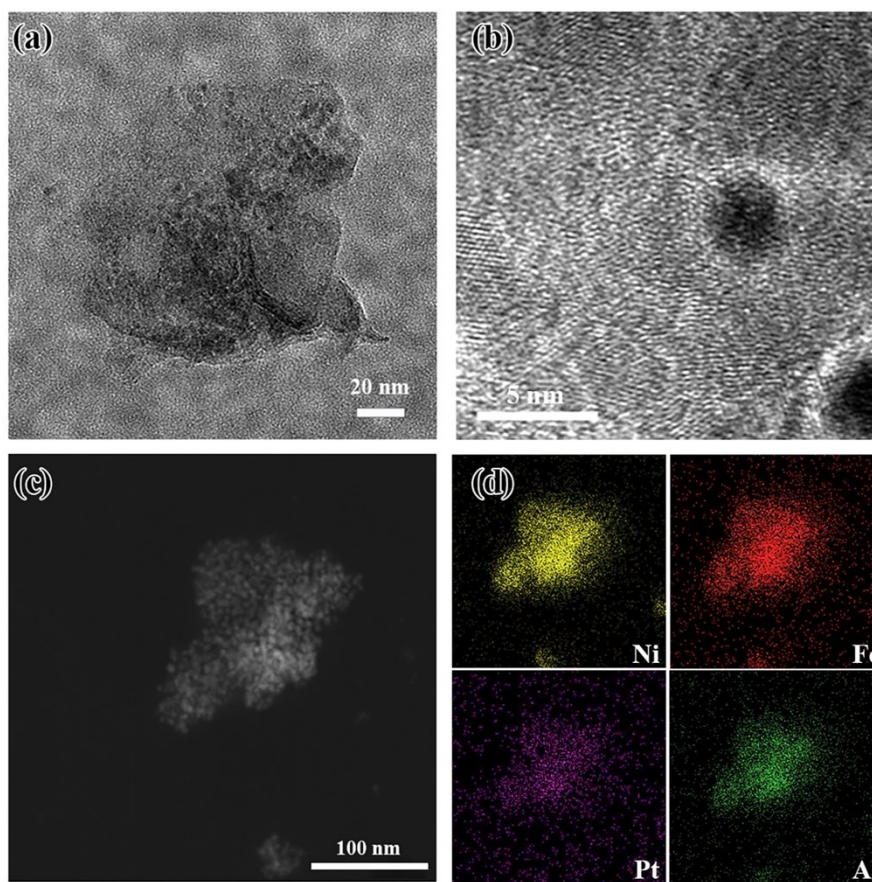

**Figure S7** (a) TEM image; (b) HRTEM image; (c) High-angle annular dark-field scanning TEM image; and (d) EDS mapping for Ni, Fe, Pt, Al of the sample Pt/NiFeAl- $x$  at  $x=200$ .

For  $x=200$ , a silk-like 2D nanosheet structure and Pt particles were indicated uniformly dispersed on NiFeAl LDH support (Figure S7). Since there is no NiFe alloy for  $x=200$ , those nanoparticles seen in HRTEM image could be identified as Pt nanoparticles. From STEM-EDS mapping in Figures S7c and 7d, Ni, Fe and Al elements are homogeneously distributed across the whole nanosheet, and no distinct aggregation signals of Pt species were detected in the image.

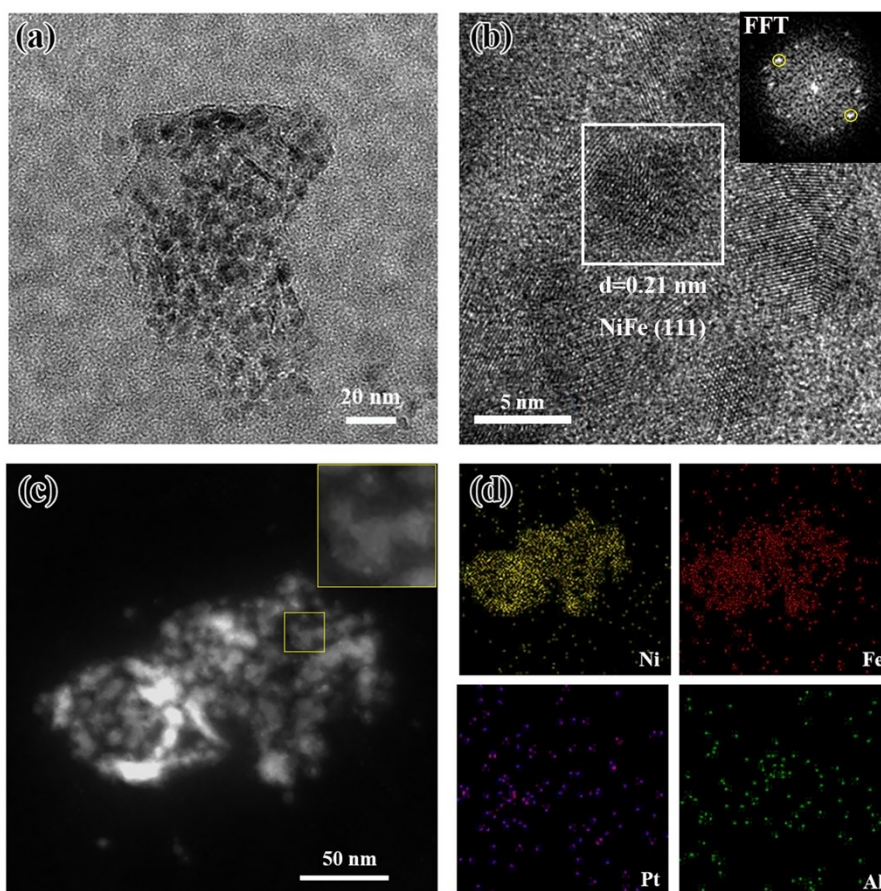

**Figure S8** (a) TEM image; (b) HRTEM image, inset shows the FFT pattern of rectangle region; (c) High-angle annular dark-field scanning TEM image, Inset shows the enlarged image of rectangle region; and (d) EDS mapping for Ni, Fe, Pt, Al of the sample Pt/NiFeAl-x at x=300.

For x=300, the original nanosheet morphology of the precursor (NiFeAl-LDH) was maintained, and NiFe alloy appeared and was evenly distributed on nanosheet support (Figure S8a). Those nanoparticles seen in HRTEM diagram cannot be distinguished to be Pt or NiFe alloy. A HRTEM image of the rectangle region in Figure S8b indicates a set of clear crystalline lattice of 2.1 Å, which could be assigned to the crystal planes (111) of NiFe alloy. Pt clusters of higher contrast can be clearly seen in the enlarged HAADF-STEM image. No distinct aggregation signals of Pt species were detected in the STEM-EDS mapping.



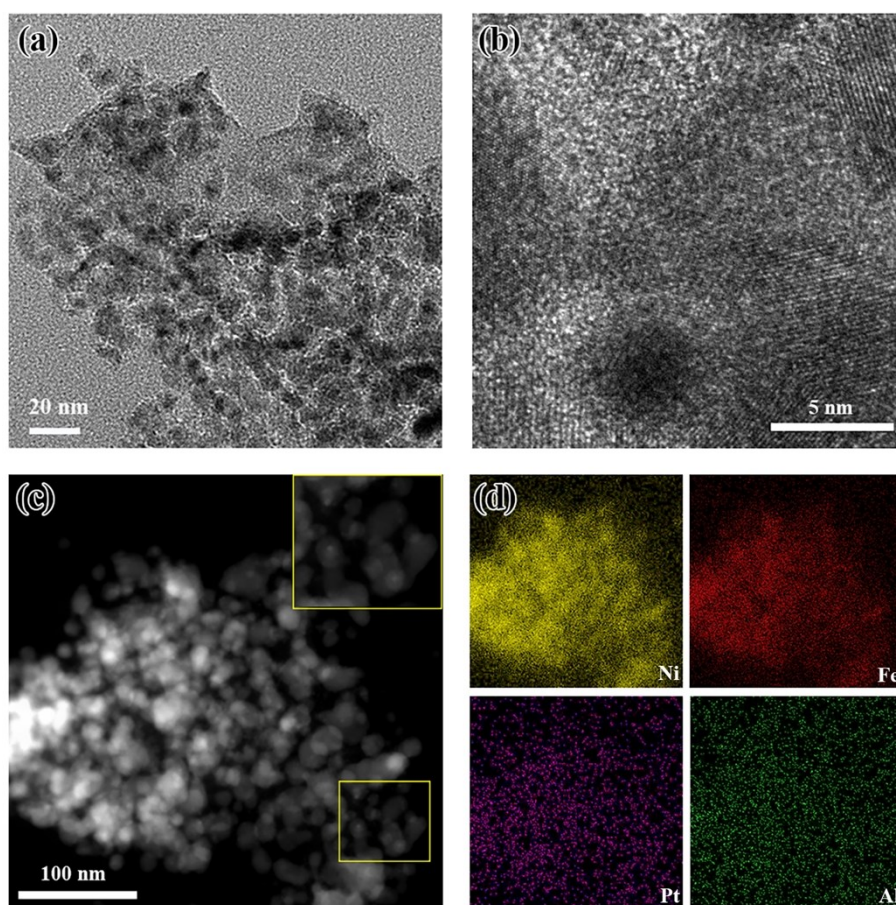

**Figure S9** (a) TEM image; (b) HRTEM image; (c) High-angle annular dark-field scanning TEM image, Inset shows the enlarged image of rectangle region; and (d) EDS mapping for Ni, Fe, Pt, Al of the sample Pt/NiFeAl-x at x=400.

For  $x=400$ , the nanosheet morphology of the precursor (NiFeAl-LDH) was maintained with the appearance of NiFe alloys (Figure S9a). Pt clusters of higher contrast were clearly seen in the enlarged HAADF-STEM image. No distinct aggregation signals of Pt species were detected in the STEM-EDS mapping.

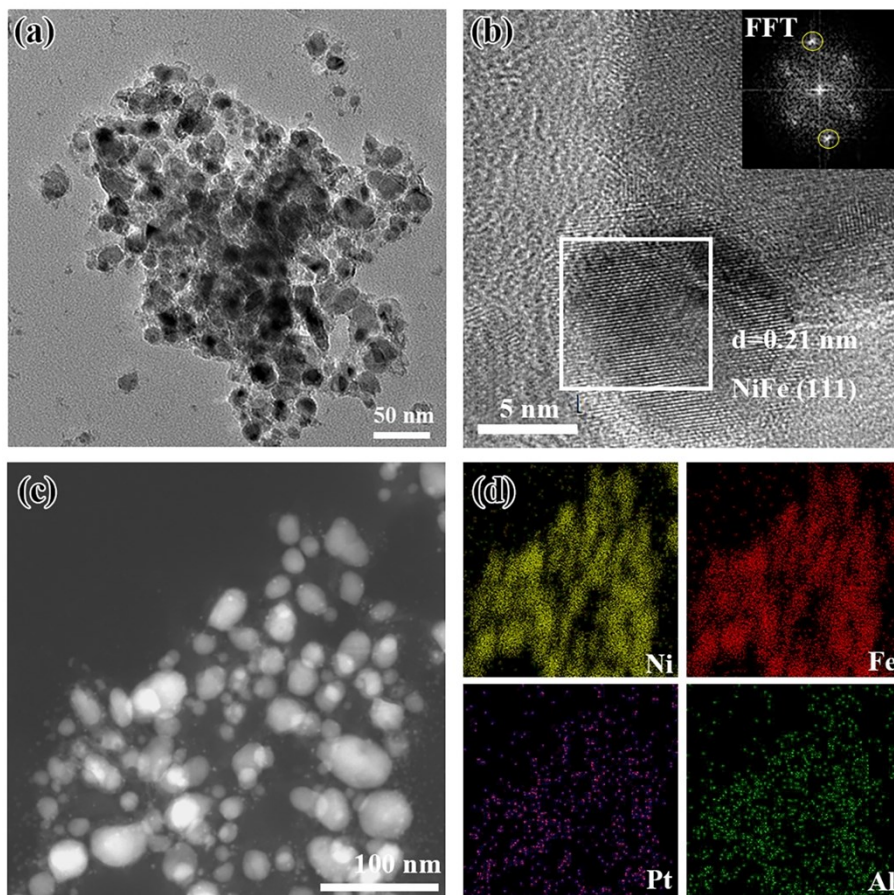

**Figure S10** (a) TEM image; (b) HRTEM image, inset shows the FFT pattern of rectangle region; (c) High-angle annular dark-field scanning TEM image, Inset shows the enlarged image of rectangle region; and (d) EDS mapping for Ni, Fe, Pt, Al of the sample Pt/NiFeAl at  $x=500$ .

For  $x=500$ , the original nanosheet morphology of the precursor (NiFeAl-LDH) could be maintained to a certain extent with the appearance of NiFe alloys (Figure S10a). NiFe alloy particles for  $x=500$  grew larger compared with those for  $x=200-400$ . Pt clusters of higher contrast were clearly seen in the enlarged HAADF-STEM image. No distinct aggregation signals of Pt species were detected in the STEM-EDS mapping.

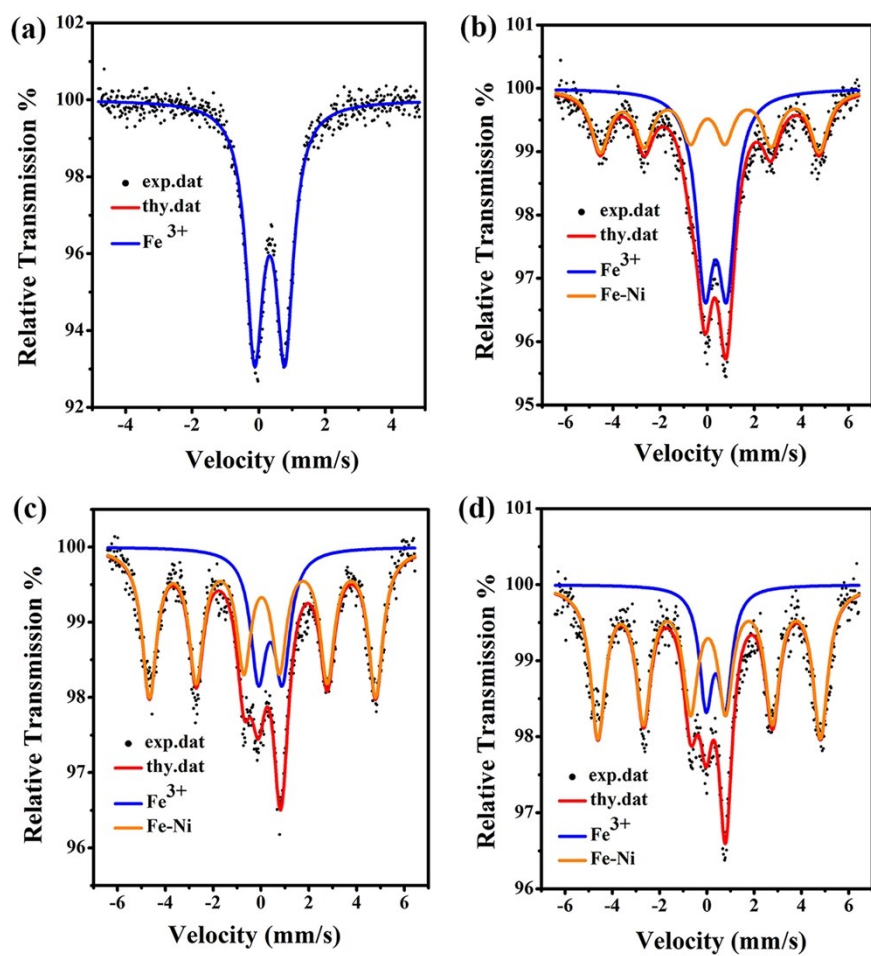

**Figure S11** Mössbauer spectra for the samples Pt/NiFeAl-x at (a) x=300; (b) x=500; (c) x=550; and (d) x=650.

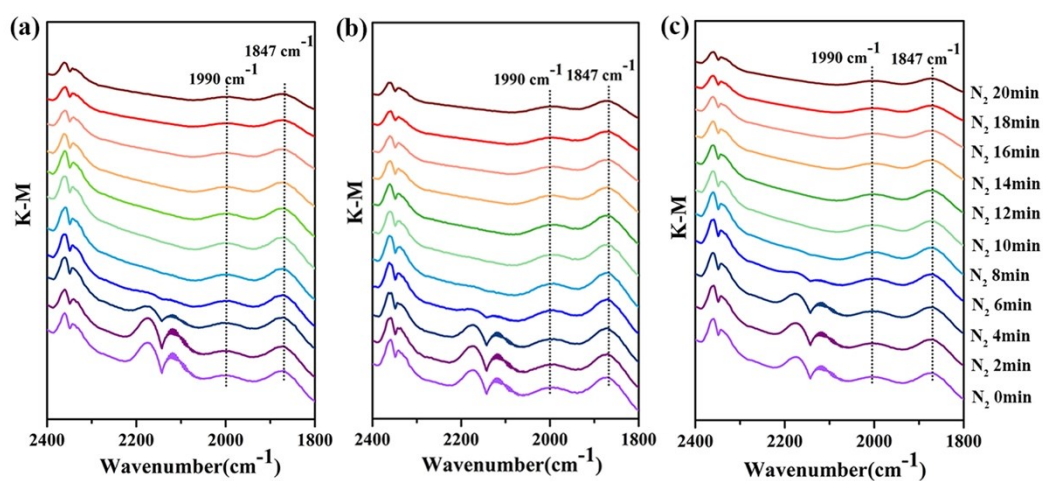

**Figure S12** Temporal evolutions of the DRIFTS spectra after saturation adsorption of CO on the samples Pt/NiFeAl-x: (a) x=500, (b) x=550 and (c) x=650 during a continuous N<sub>2</sub> flushing.

**Table S1** Comparisons of CO oxidation activities of the sample Pt/NiFeAl-x at x=600 with those of catalysts reported in literatures.

| Sample                                                 | Amount of catalyst (mg) | Space Velocity (h <sup>-1</sup> ) | Feed gas                                                 | T <sub>100</sub> | Reference |
|--------------------------------------------------------|-------------------------|-----------------------------------|----------------------------------------------------------|------------------|-----------|
| Pt/NiFeAl-600                                          | 50                      | 60 000                            | 1% CO, 20% O <sub>2</sub> , He balance                   | 100 °C           | This work |
| AuCu/Al <sub>2</sub> O <sub>3</sub>                    | Undefined               | 3 000 000                         | 1% CO, 6% O <sub>2</sub> , He balance                    | 200 °C           | 1         |
| PdNi@HNTs                                              | 50                      | 72 000                            | 3.5% CO, 20% O <sub>2</sub> , Ar balance                 | 122 °C           | 2         |
| Cu-Rh <sub>1-3</sub> NSUrs                             | 100                     | Undefined                         | 2% CO, 2 % O <sub>2</sub> , N <sub>2</sub> balance       | 140 °C           | 3         |
| Pd-4.6/Co <sub>3</sub> O <sub>4</sub>                  | 50                      | Undefined                         | 1% CO, 1% O <sub>2</sub> , Ar balance                    | 160 °C           | 4         |
| Pt/Fe <sub>3</sub> O <sub>4</sub>                      | 50                      | 240 000                           | 1500 ppm CO, 10% O <sub>2</sub> , N <sub>2</sub> balance | 150 °C           | 5         |
| Pt-Ni <sub>0.3</sub> Co <sub>2.7</sub> O <sub>4</sub>  | 55                      | 15 000                            | 1% CO, 20% O <sub>2</sub> , N <sub>2</sub> balance       | 120 °C           | 6         |
| Pt-Co <sub>3</sub> O <sub>4</sub>                      | 55                      | 15 000                            | 1% CO, 20% O <sub>2</sub> , N <sub>2</sub> balance       | 260 °C           | 6         |
| Pt-NiO                                                 | 55                      | 15 000                            | 1% CO, 20% O <sub>2</sub> , N <sub>2</sub> balance       | 270 °C           | 6         |
| 0.2Pt/m-Al <sub>2</sub> O <sub>3</sub> -H <sub>2</sub> | 100                     | 24 000 000                        | 2.5% CO, 2.5% O <sub>2</sub> , Ar balance                | 280 °C           | 7         |
| Pt/CeO <sub>2</sub> -S                                 | 30                      | 200 000                           | 0.4 % CO, 10 % O <sub>2</sub> , Ar balance               | 148 °C           | 8         |
| Leached PtNi/CB                                        | Undefined               | 30 000                            | 1% CO, 20% O <sub>2</sub> , He balance                   | 140 °C           | 9         |
| Pt/C70G30                                              | 200                     | 16 000                            | 0.2% CO, 0.9% O <sub>2</sub> , He balance                | 250 °C           | 10        |
| Pt/DBD-WO <sub>3</sub>                                 | Undefined               | Undefined                         | 1% CO, 20% O <sub>2</sub> , N <sub>2</sub> balance       | 140 °C           | 11        |



## References:

- (1) S. Najafshirtari, R. Brescia, P. Guardia, S. Marras, L. Manna, M. Colombo, *ACS Catal*, **2015**, 5, 2154-2163.
- (2) Y. H. Ahmad, A. T. Mohamed, W. M. I. Hassan, A. Soliman, K. A. Mahmoud, A. S. Aljaber, S. Y. Al-Qaradawi, *Appl. Surf. Sci.*, **2019**, 493, 70-80.
- (3) W. Wang, Z. Cao, K. Liu, J. Chen, Y. Wang, S. Xie, *Nano Lett*, **2017**, 17, 7613-7619.
- (4) R. Huang, K. Kim, H. J. Kim, M. G. Jang, J. W. Han, *ACS Appl. Nano. Materials*, **2020**, 3, 486-495.
- (5) L. Ma, X. Chen, J. Li, H. Chang, J. W. Schwank, *Catal. Today*, <https://doi.org/10.1016/j.cattod.2019.06.055>
- (6) X. Wang, D. Liu, F. Wang, J. Li, J. Zhen, H. Zhang, *ChemPlusChem*, **2015**, 80, 1241-1244.
- (7) Z. Zhang, Y. Zhu, H. Asakura, B. Zhang, J. Zhang, M. Zhou, Y. Han, T. Tanaka, A. Wang, T. Zhang, N. Yan, *Nat Commun*, **2017**, 8, 16100.
- (8) L. Nie, D. Mei, H. Xiong, B. Peng, Z. Ren, X. I. P. Hernandez, A. DeLaRiva, M. Wang, M. H. Engelhard, L. Kovarik, A. K. Datye, Y. Wang, *Science*, **2017**, 358, 1419-1423.
- (9) R. Mu, Q. Fu, H. Xu, H. Zhang, Y. Huang, Z. Jiang, S. Zhang, D. Tan, X. Bao, *J. Am. Chem. Soc.*, **2011**, 133, 1978-1986.
- (10) C. Meephoka, C. Chaisuk, P. Samparnpiboon, P. Prasertthdam, *Catal. Commun*, **2008**, 9, 546-550.

(11) J. Wang, Z. Wang, C. J. Liu, *ACS Appl. Mater. Interfaces*, **2014**, 6, 12860-12867.
